# Supplementary material for: Role of the E3 ubiquitin-ligase Hakai in intestinal inflammation and cancer bowel disease
Source: PubMed Central journal article supplement (PMC9584894; doi:10.1038/s41598-022-22295-w), 2022-10-20
Supplement: 41598_2022_22295_MOESM1_ESM.pdf [file 41598_2022_22295_MOESM1_ESM.pdf]

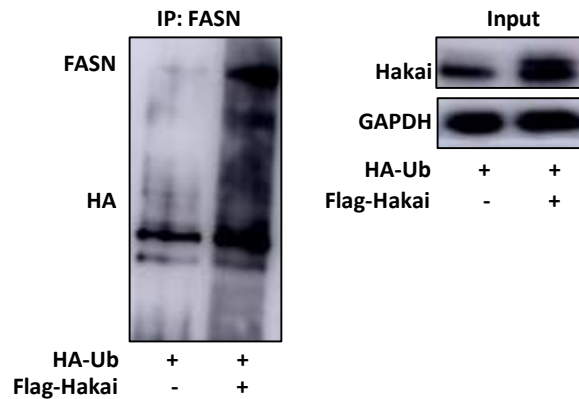

**Fig. S1.** Hakai-dependent ubiquitination of FASN. Flag-Hakai and HA-ubiquitin were transiently transfected into HCT116 cells. Immunoprecipitation was performed with the anti-FASN antibody before Western blotting, using the indicated antibodies. Please note that the blot at the left panel was firstly blotted using HA-antibody to detect ubiquitin and then re-blotted using FASN antibody.

**3A**

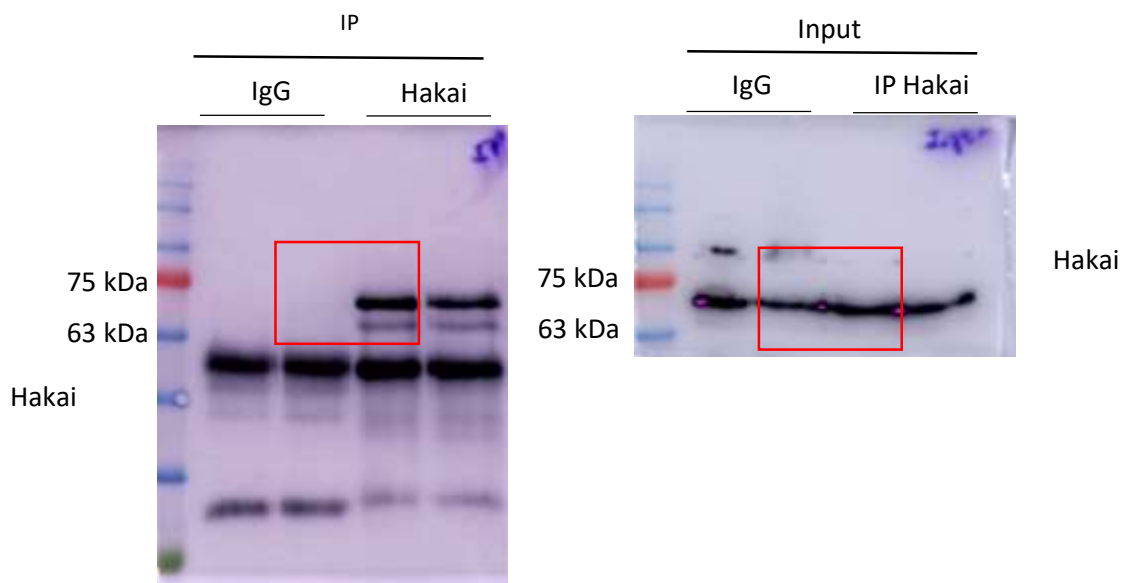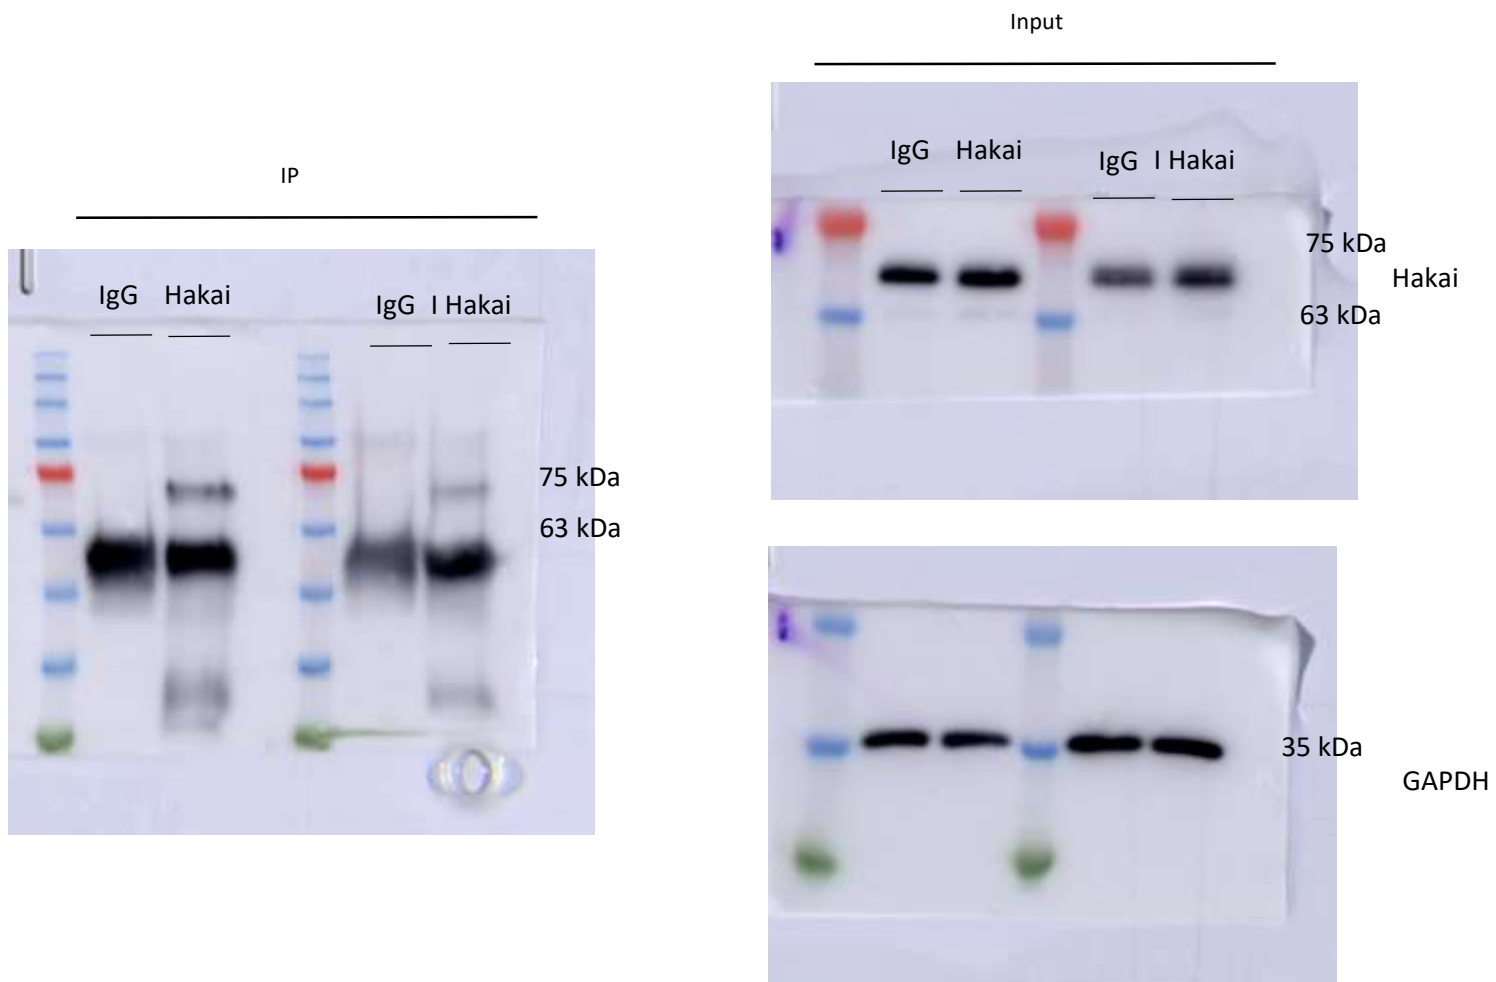

**Fig. S2.** Full blots corresponding to Figure 3A

3C

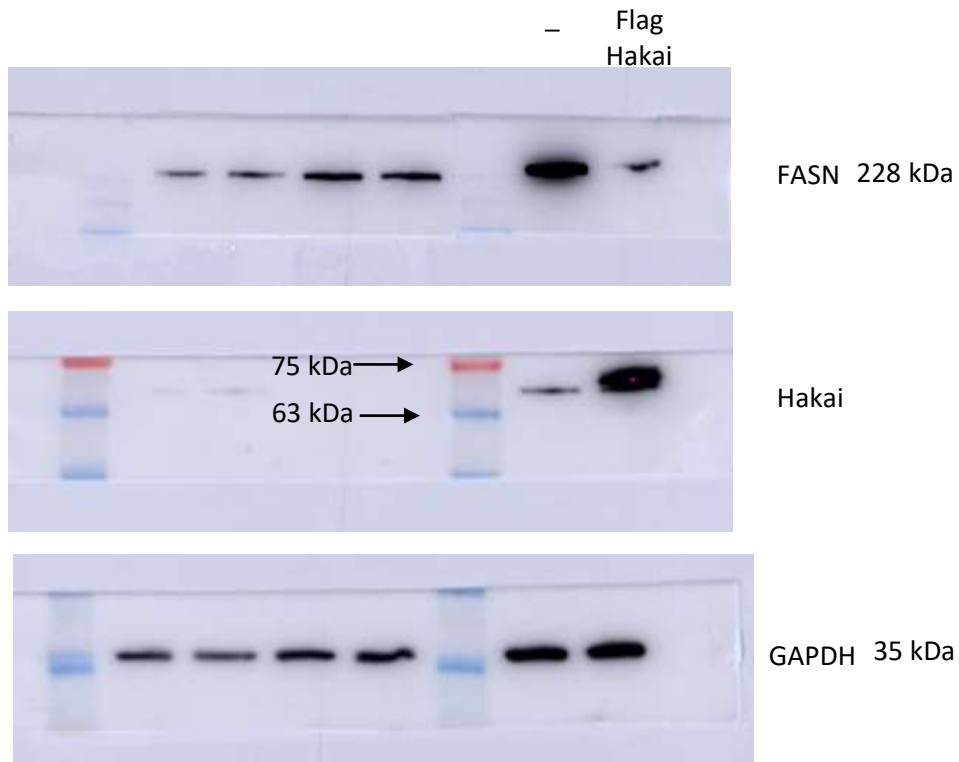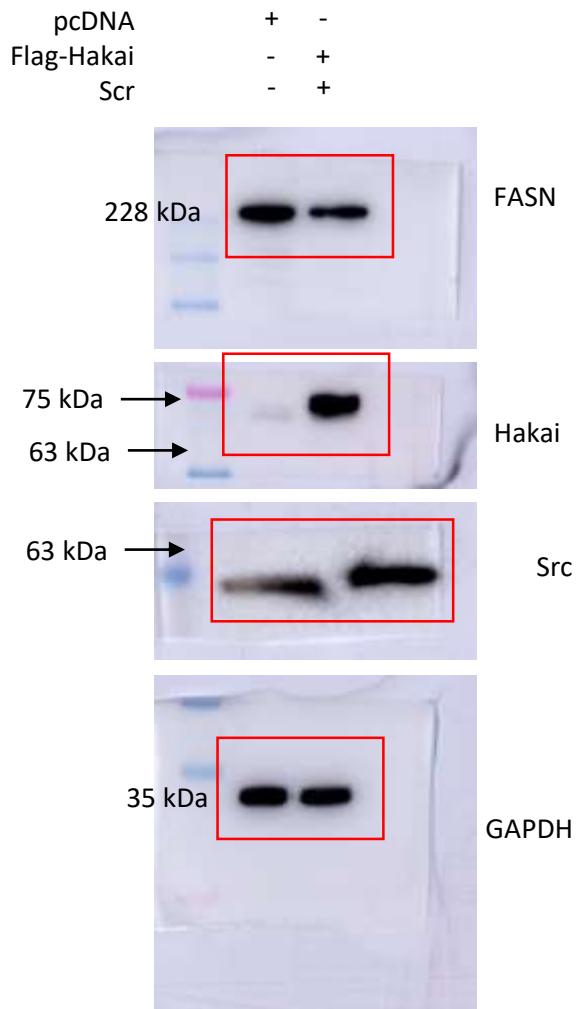

**Fig. S3.** Full blots corresponding to Figure 3C

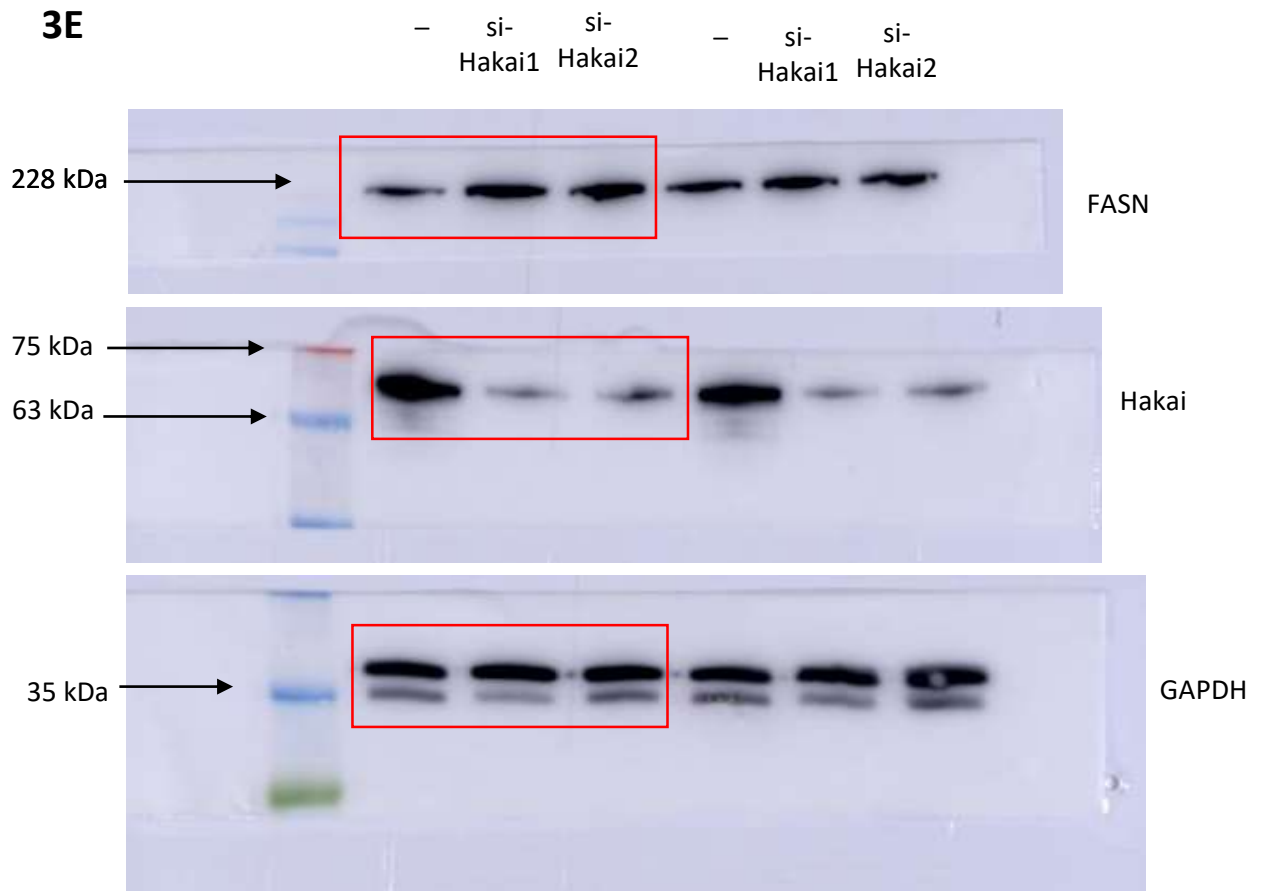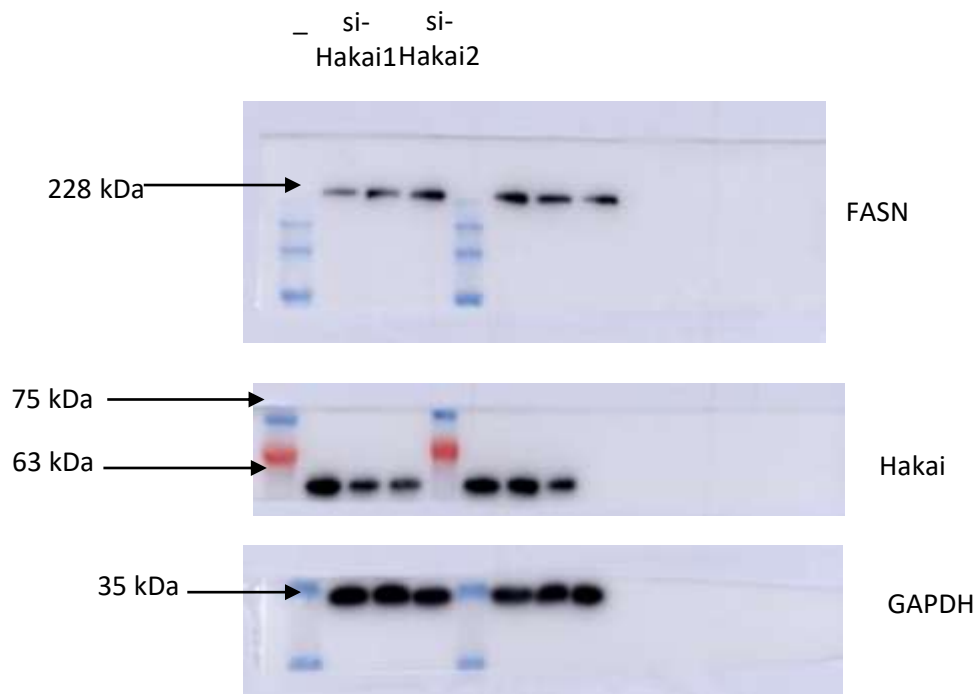

**Fig. S4.** Full blots corresponding to Figure 3E

**3F**

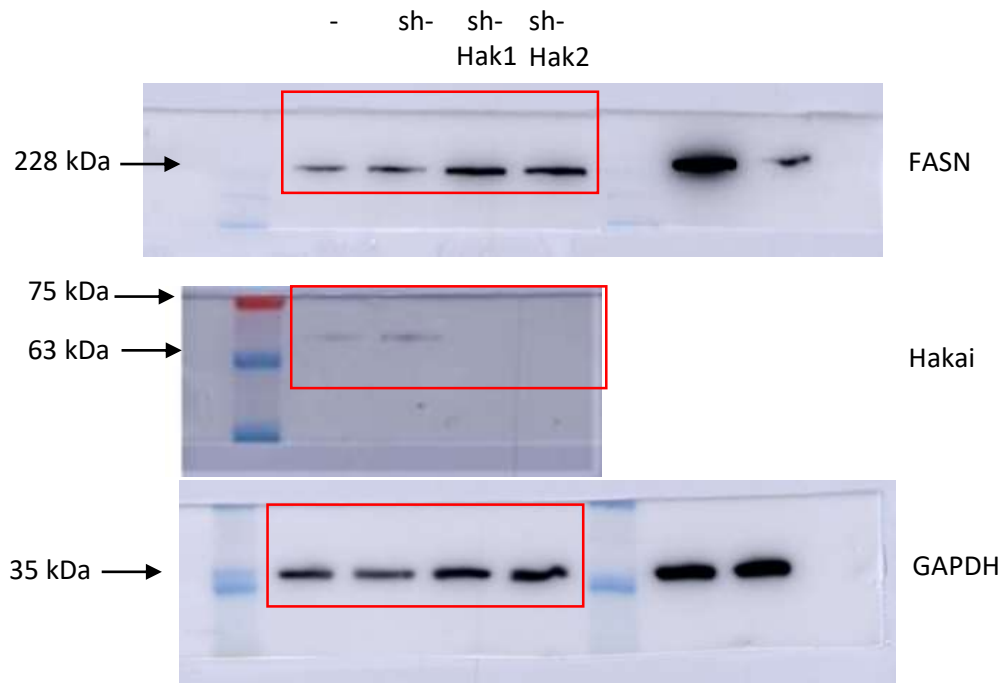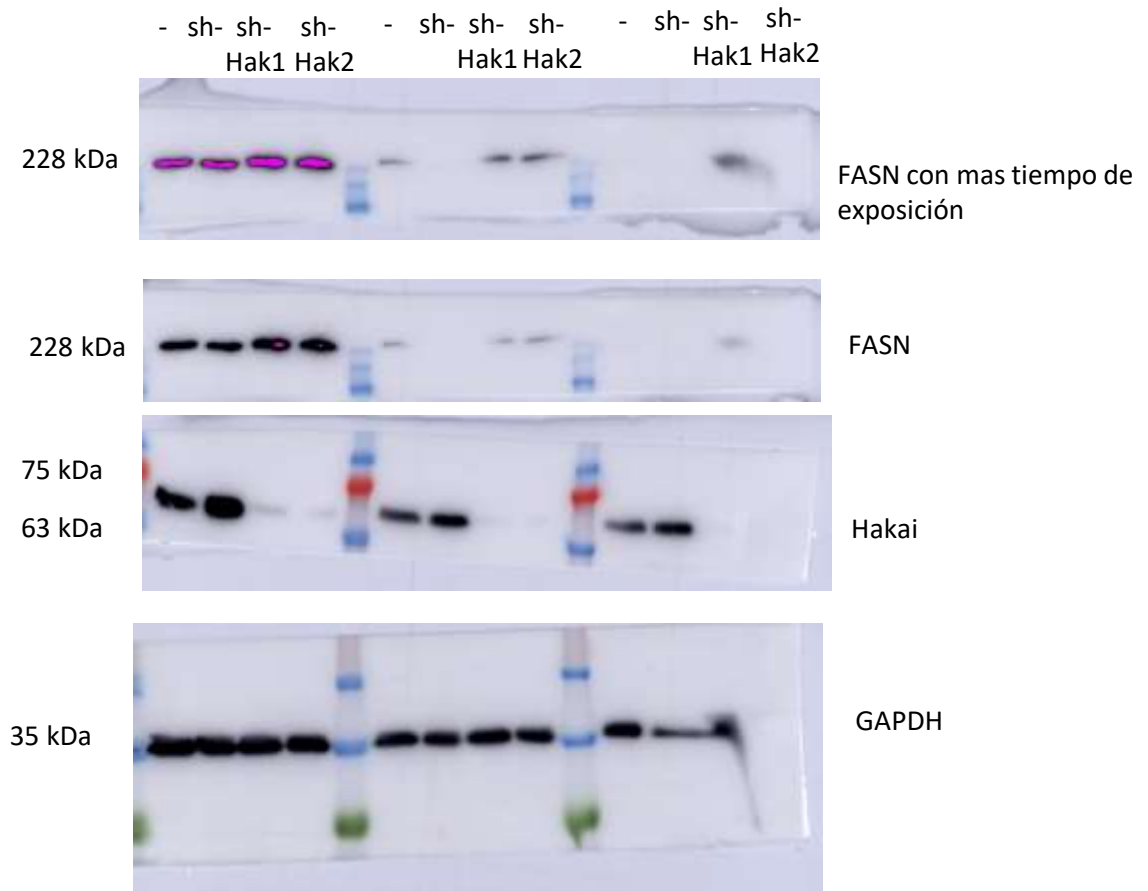

**Fig. S5.** Full blots corresponding to Figure 3F

**4A**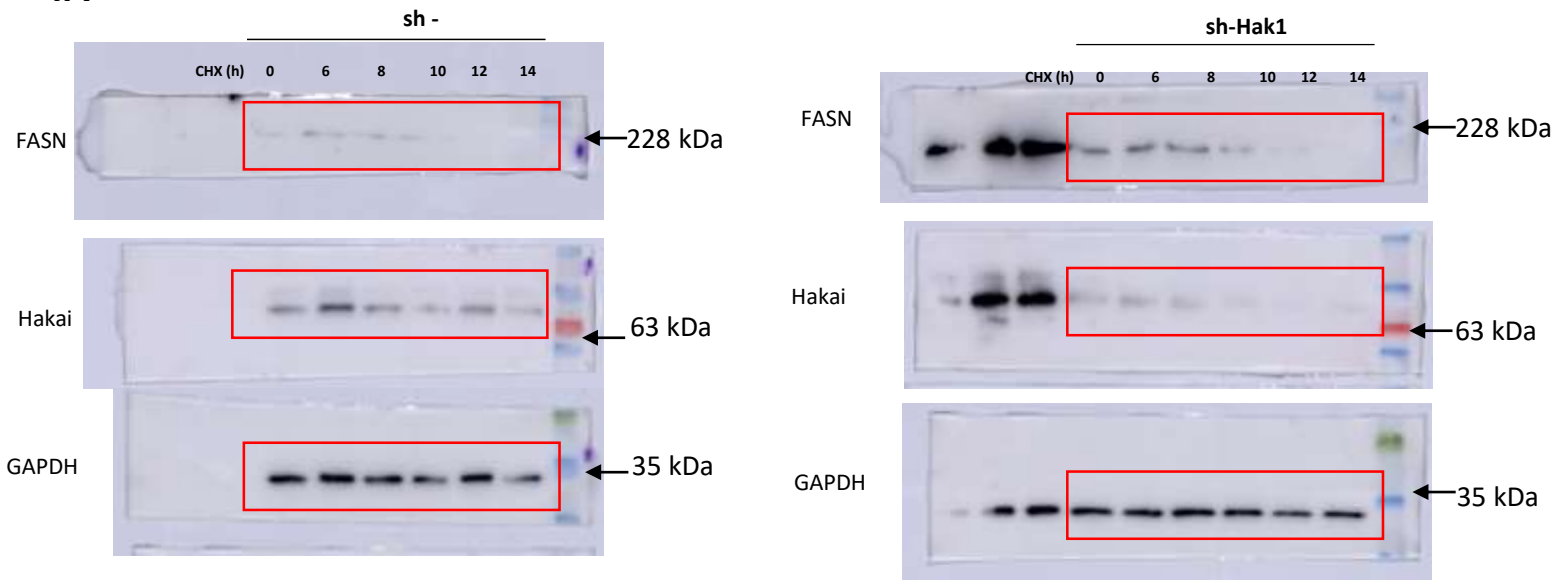**4B**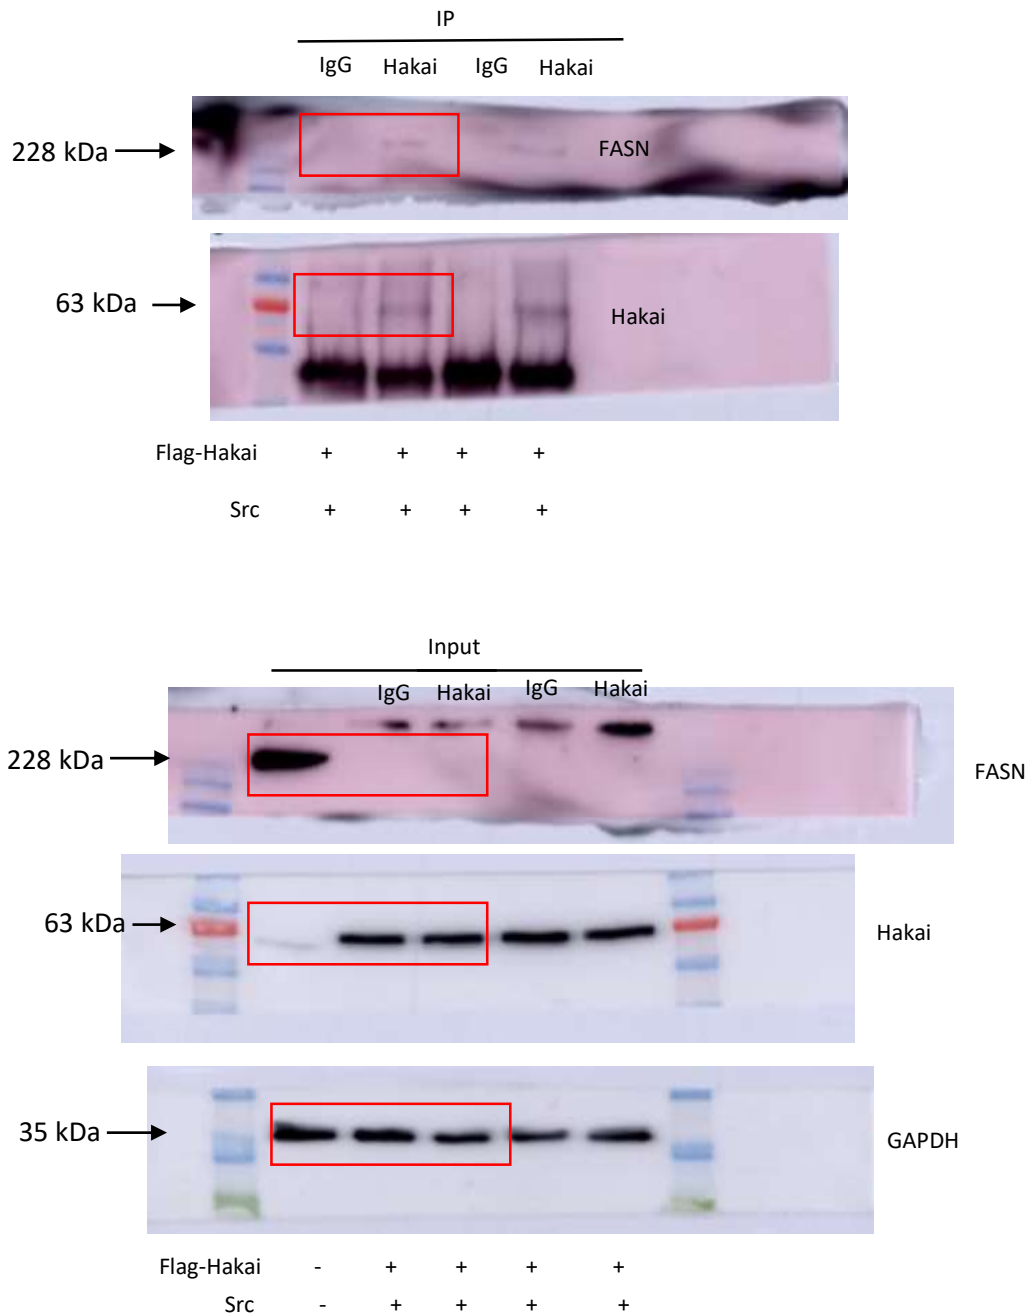**Fig. S6.** Full blots corresponding to Figure 4A and B

4C

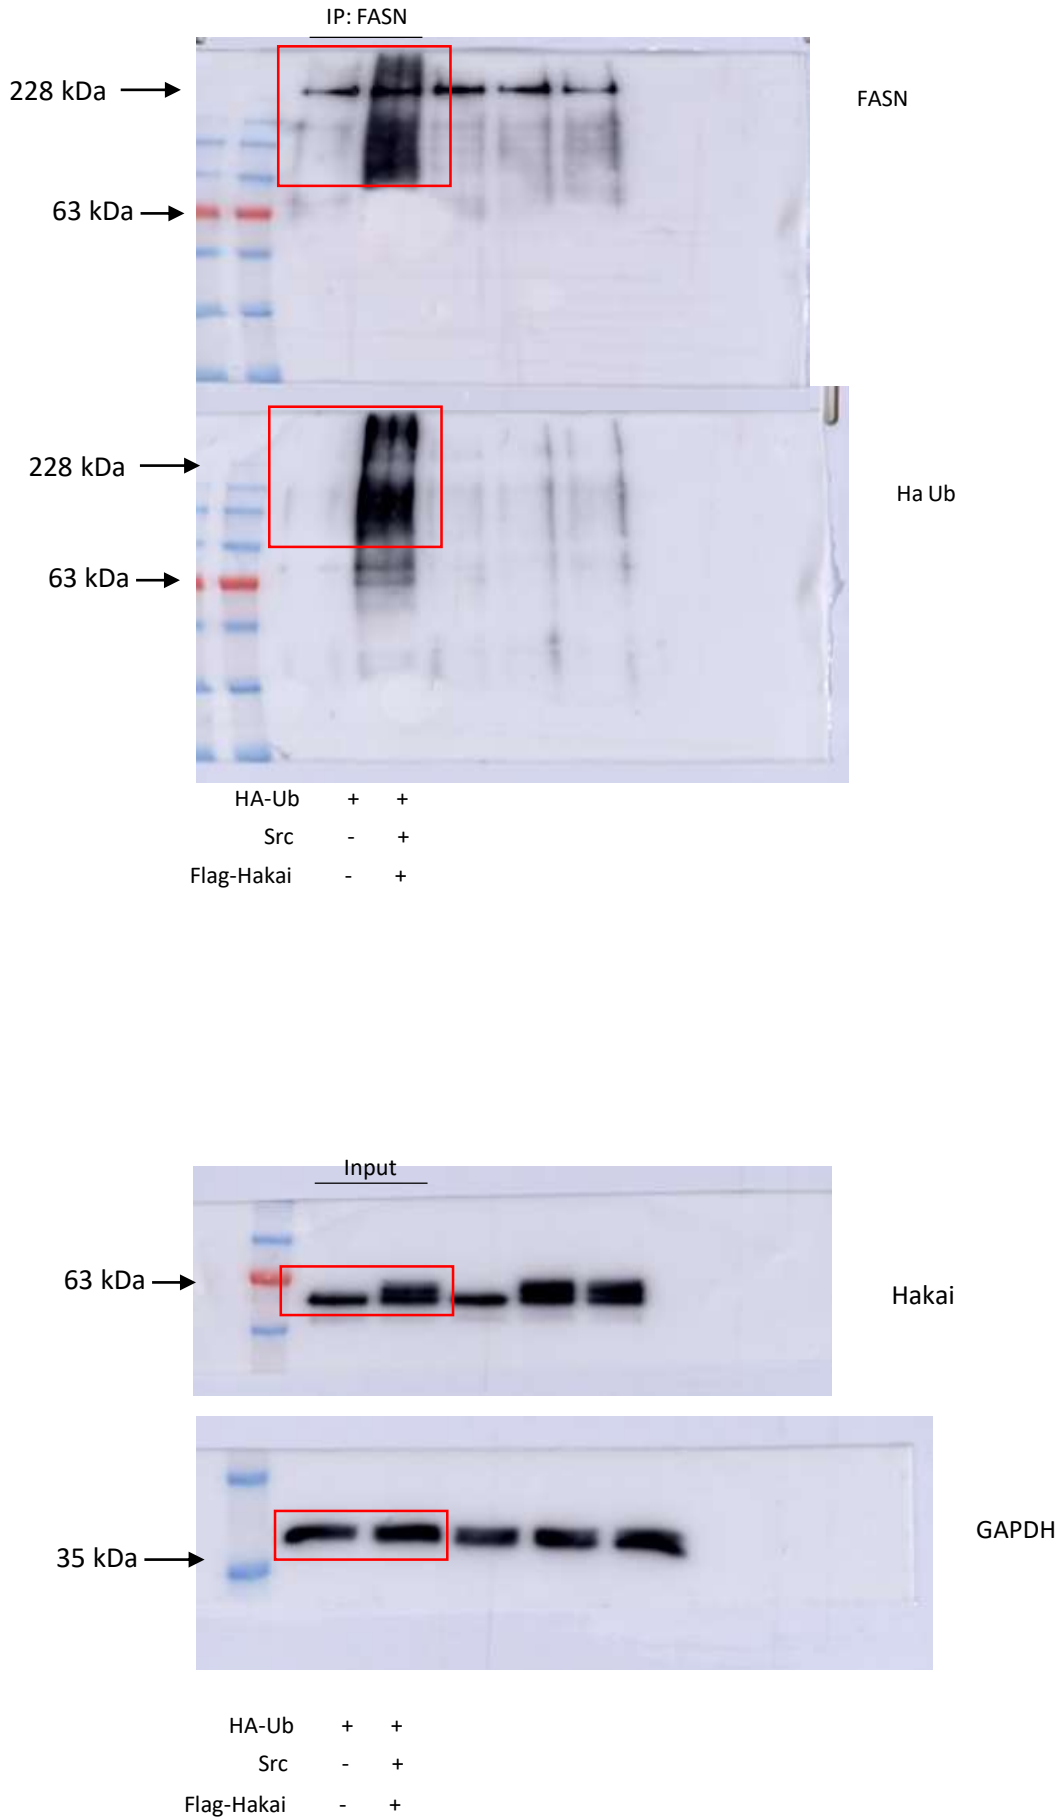

Fig. S7. Full blots corresponding to Figure 4C

4C

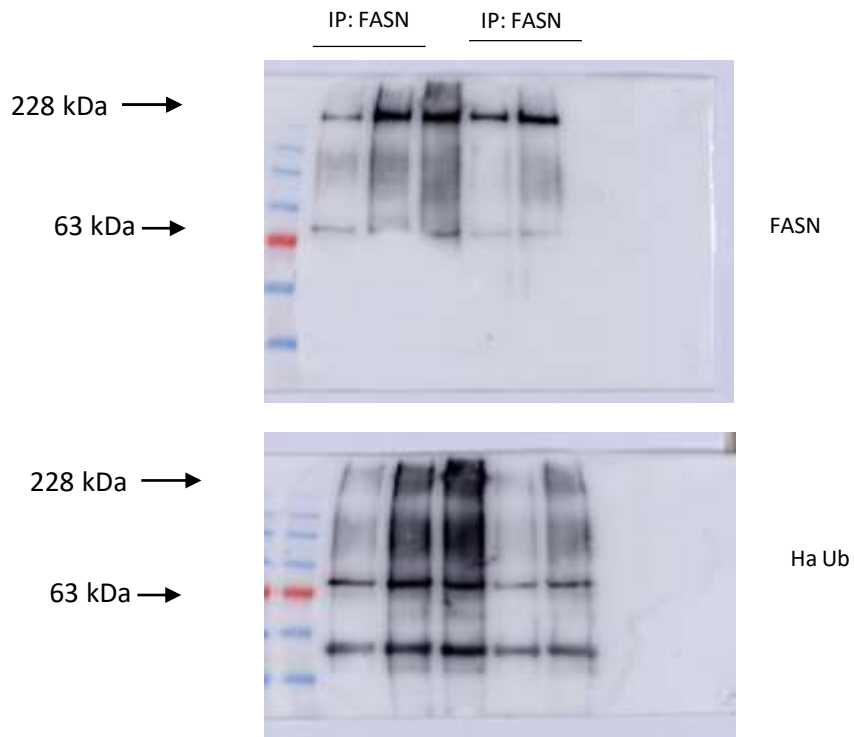

|            |   |   |   |   |
|------------|---|---|---|---|
| HA-Ub      | + | + | + | + |
| Src        | - | + | - | + |
| Flag-Hakai | - | + | - | + |

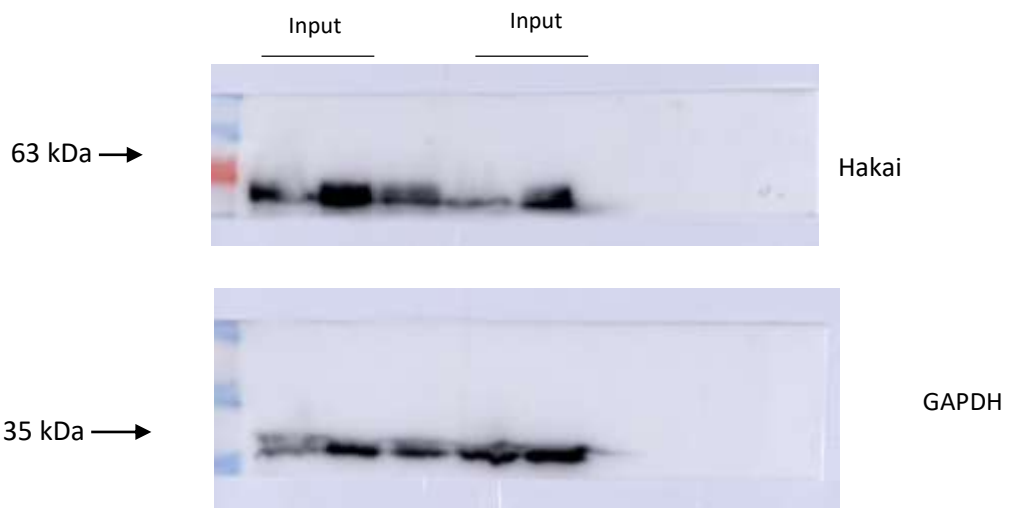

|            |   |   |   |   |
|------------|---|---|---|---|
| HA-Ub      | + | + | + | + |
| Src        | - | + | - | + |
| Flag-Hakai | - | + | - | + |

Fig. S8. Full blots corresponding to Figure 4C



4D

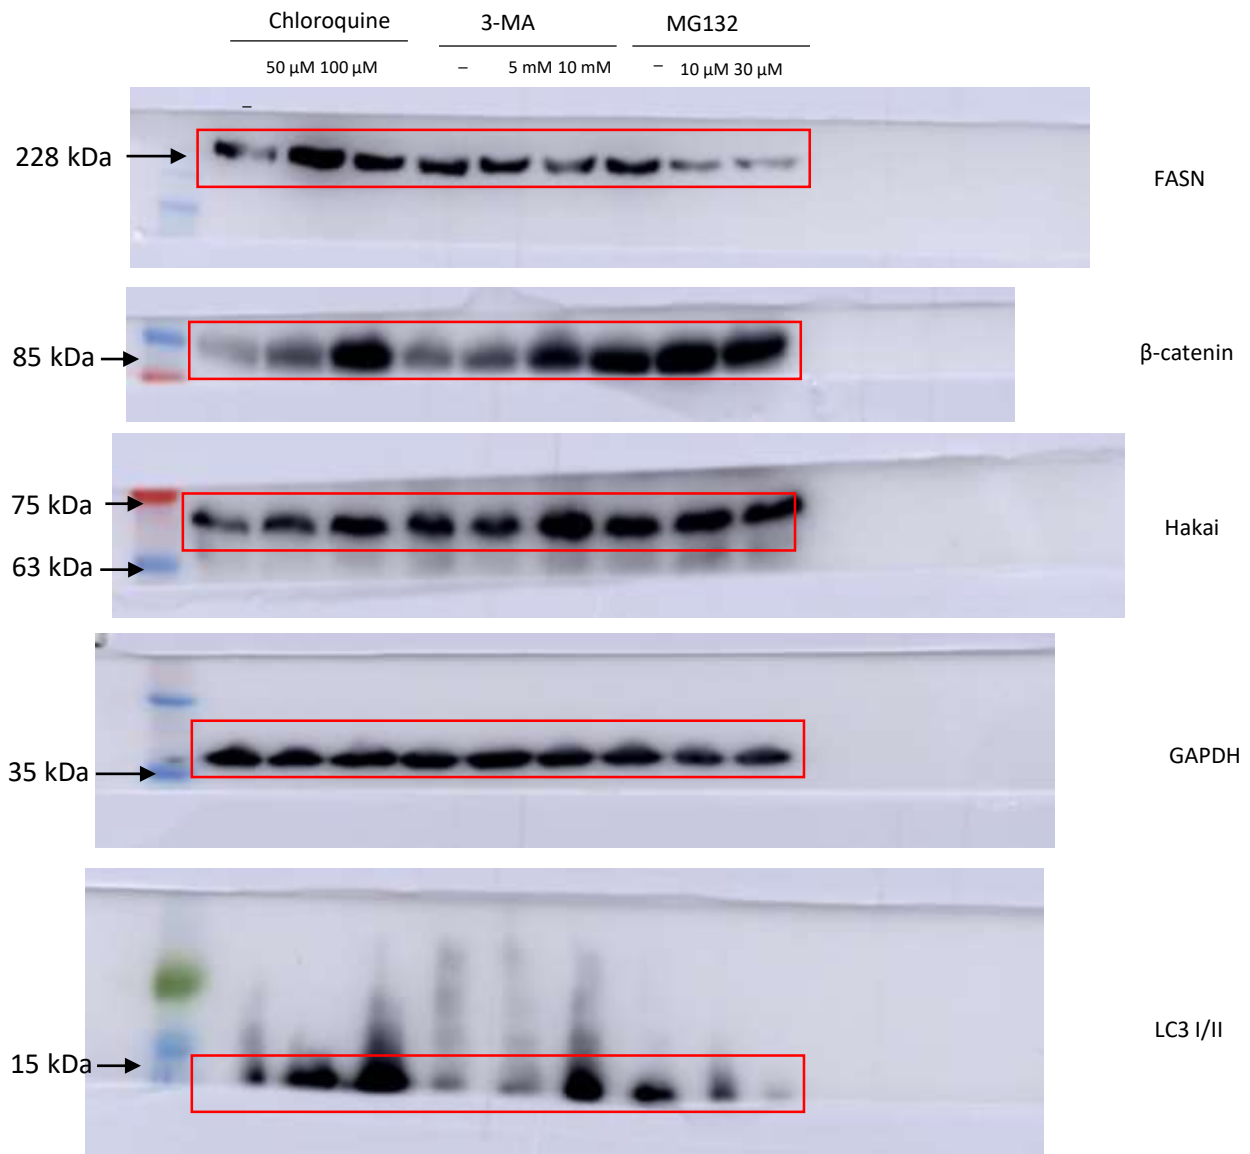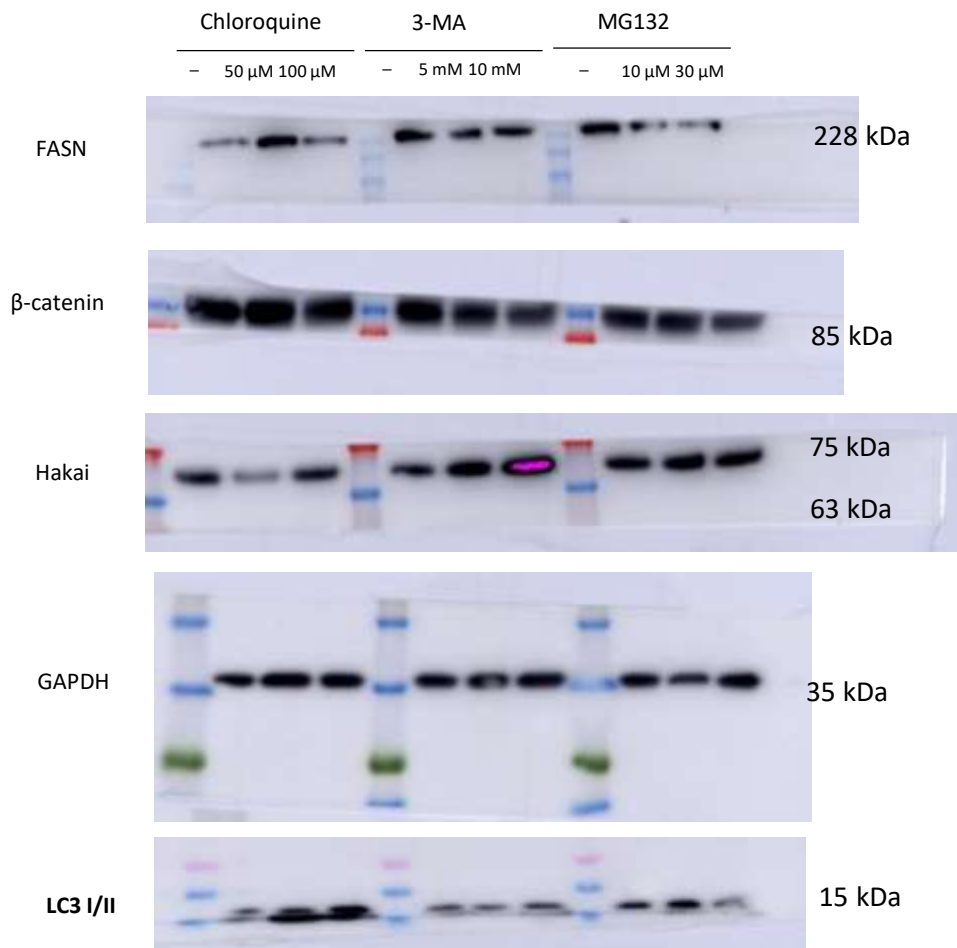

Fig. S9. Full blots corresponding to Figure 4D

# 4D

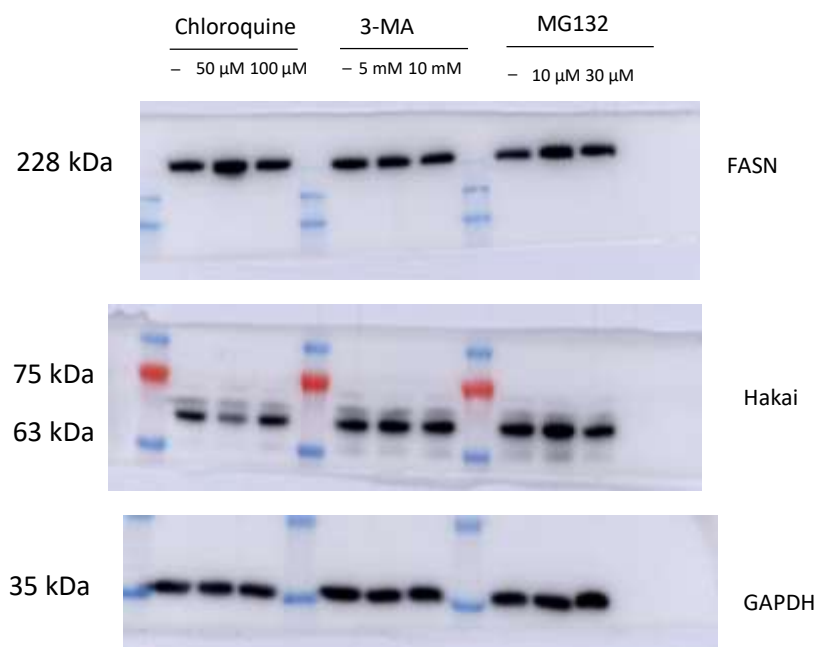

# 4E

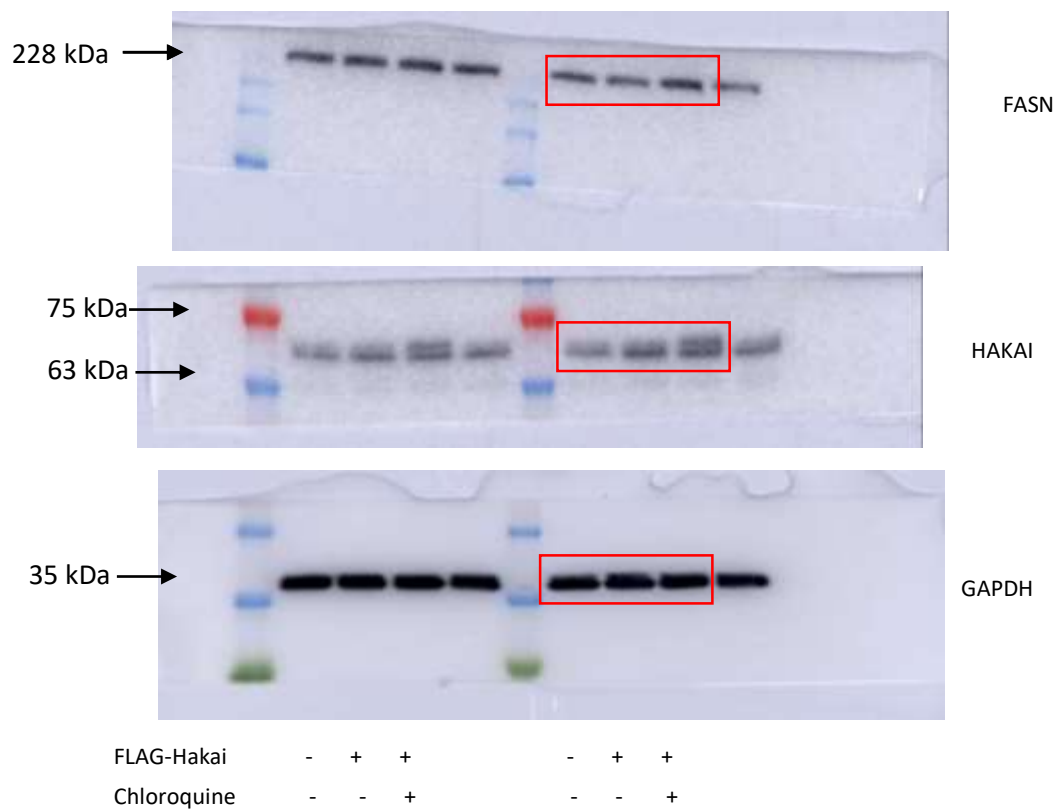

**Fig. S10.** Full blots corresponding to Figure 4D and E

**4E**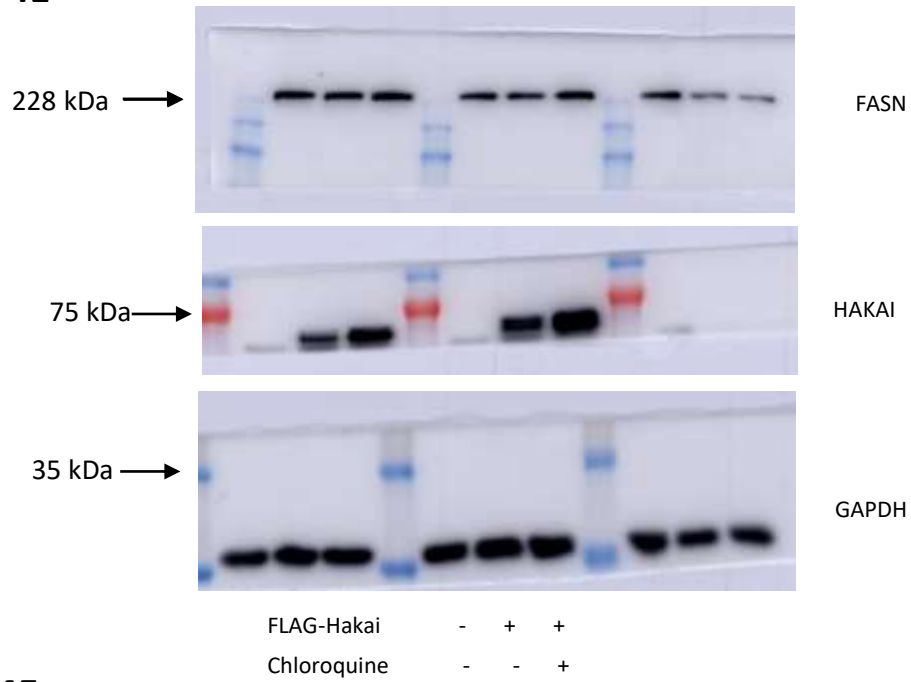**4F**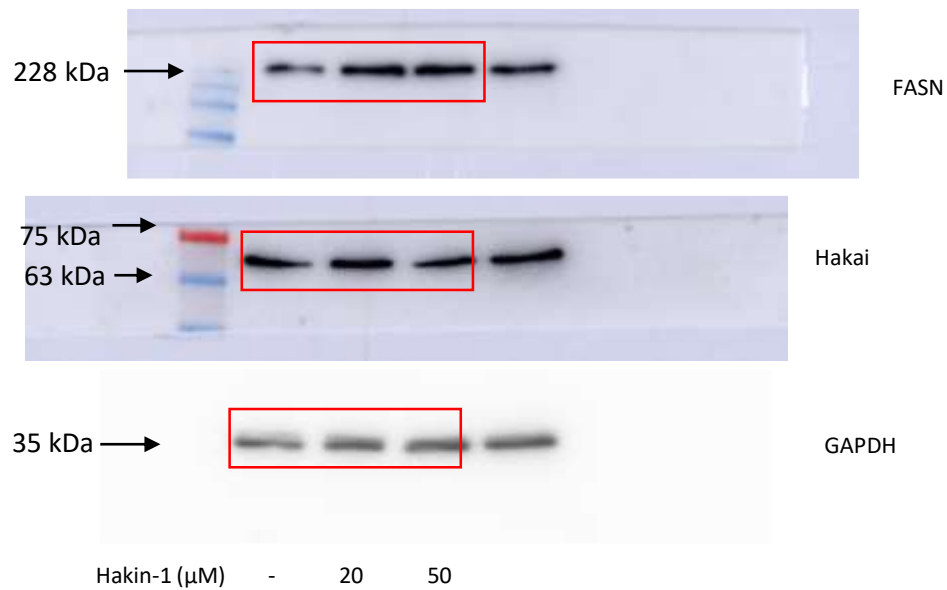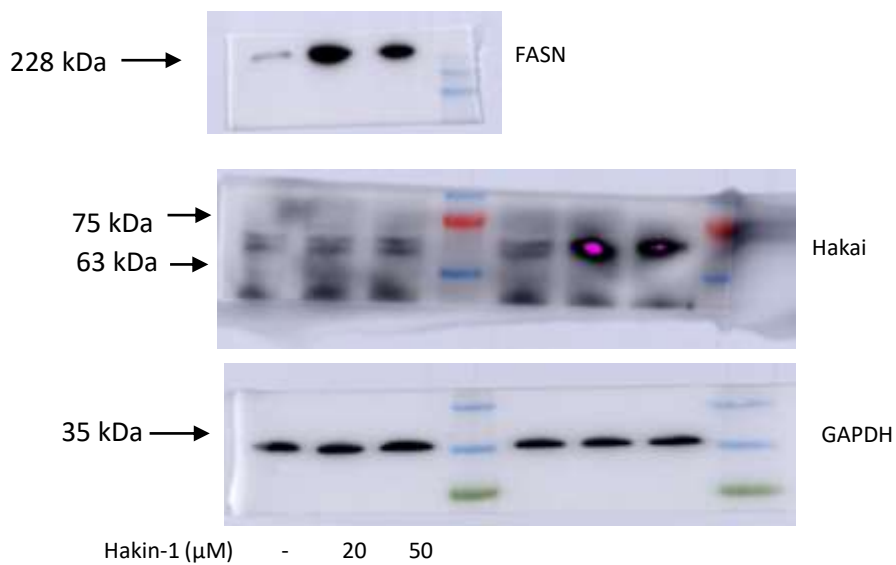**Fig. S11.** Full blots corresponding to Figure 4E and F

4G

IP FASN

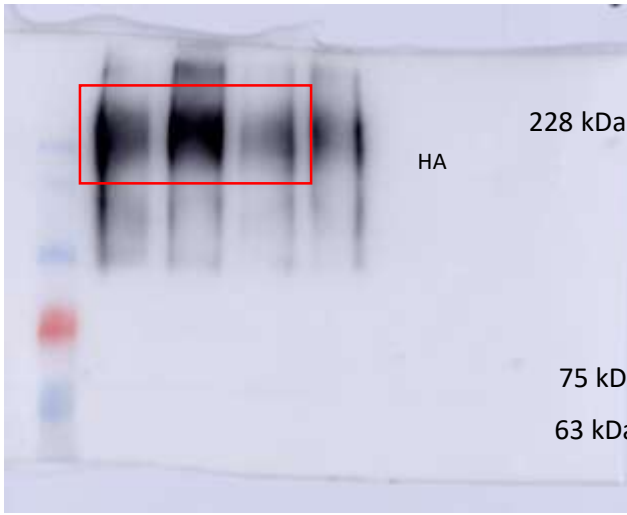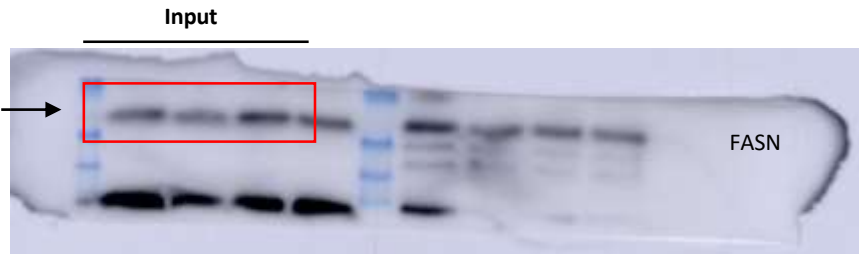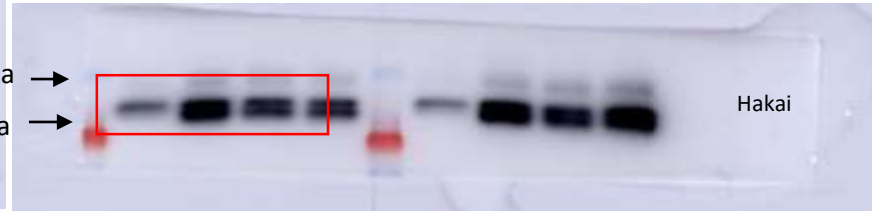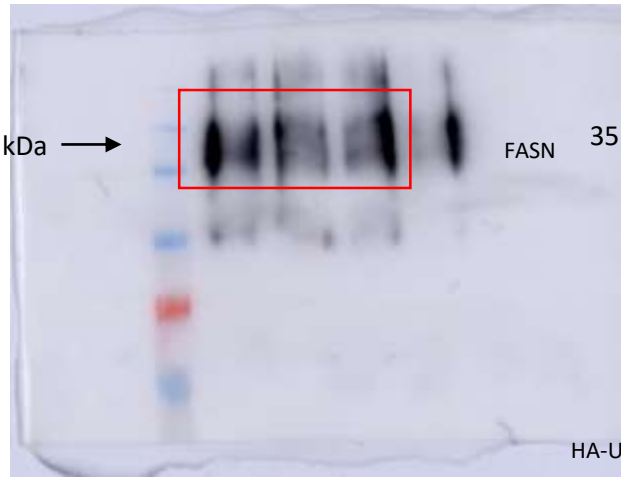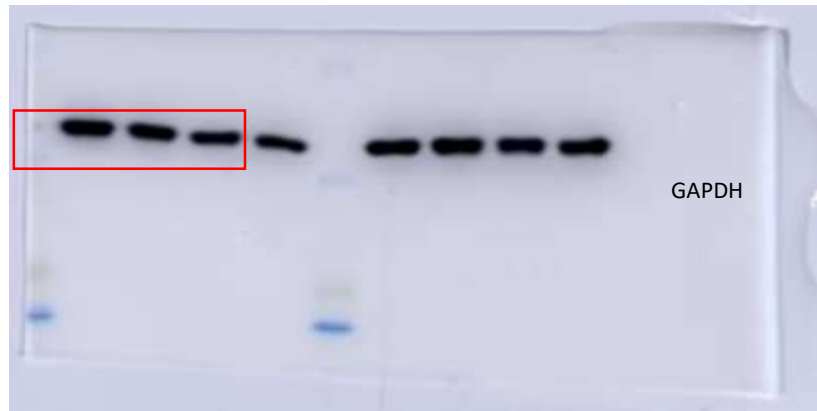

|                 |   |   |   |
|-----------------|---|---|---|
| Ha-Ubiquitin    | + | + | + |
| Flag-Hakai      | - | + | + |
| Hakin-1 (50 μM) | - | - | + |

|              |   |   |   |
|--------------|---|---|---|
| HA-Ubiquitin | + | + | + |
| Flag-Hakai   | - | + | + |
| Hakin-1      | - | - | + |

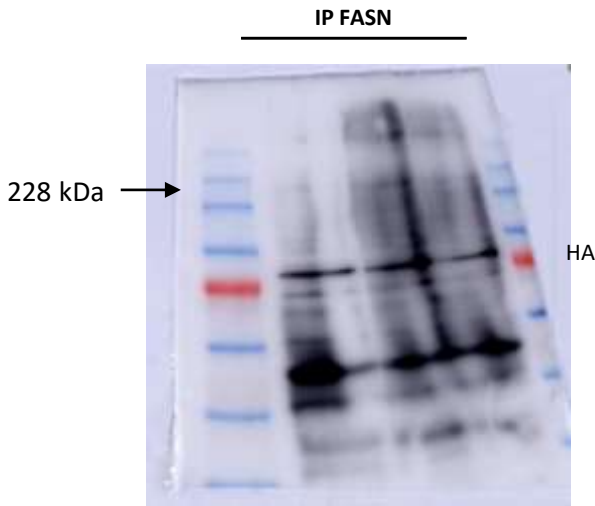

|                 |   |      |      |
|-----------------|---|------|------|
| Ha-Ubiquitin    | + | +    | +    |
| Flag-Hakai      | - | +    | +    |
| Hakin-1 (50 μM) | - | -    | +    |
|                 | 1 | 2.48 | 2.09 |

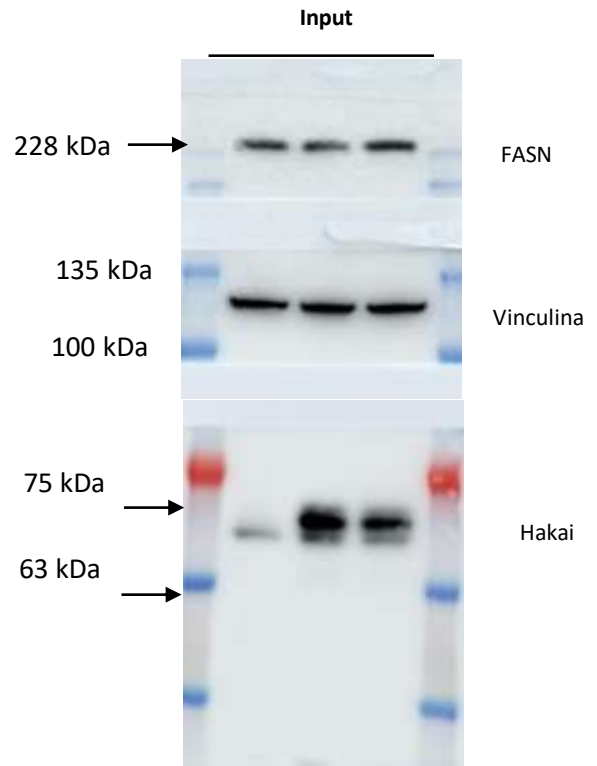

|                 |   |   |   |
|-----------------|---|---|---|
| Ha-Ubiquitin    | + | + | + |
| Flag-Hakai      | - | + | + |
| Hakin-1 (50 μM) | - | - | + |

Fig. S12. Full blots corresponding to Figure 4G

**5A**

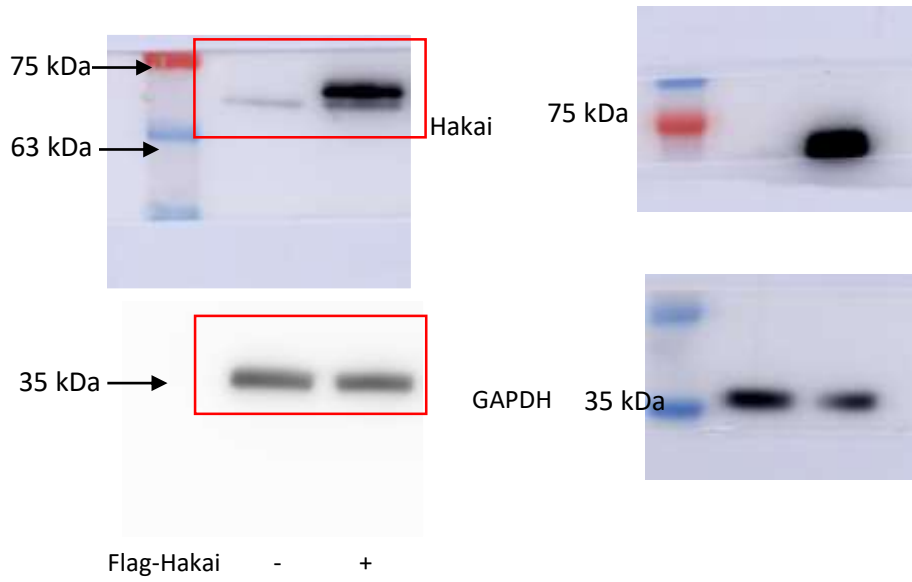

**5C**

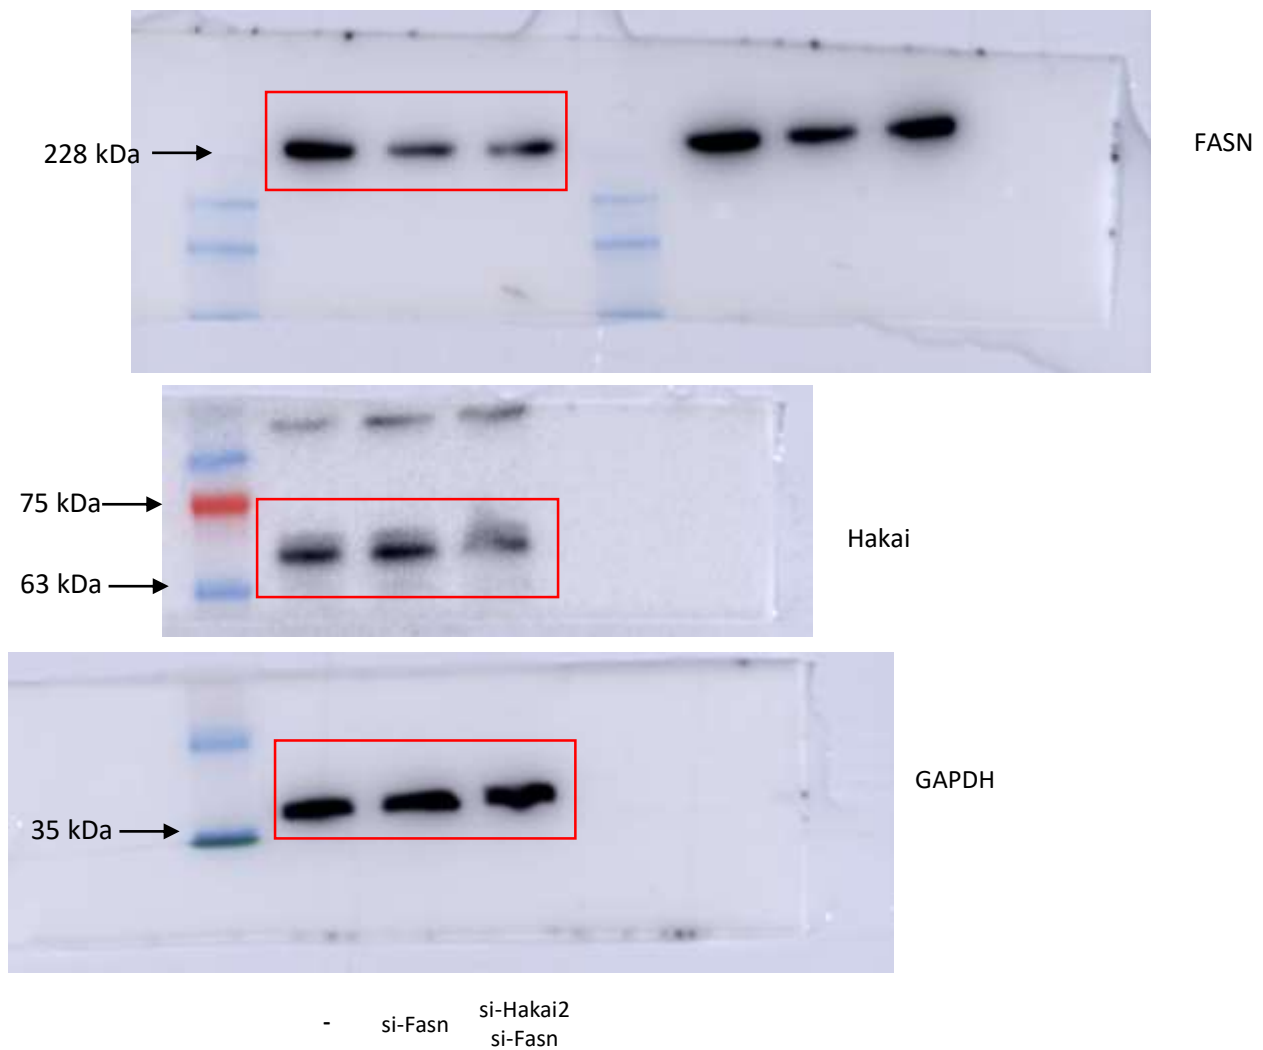

**Fig. S13.** Full blots corresponding to Figure 5A and C

5C

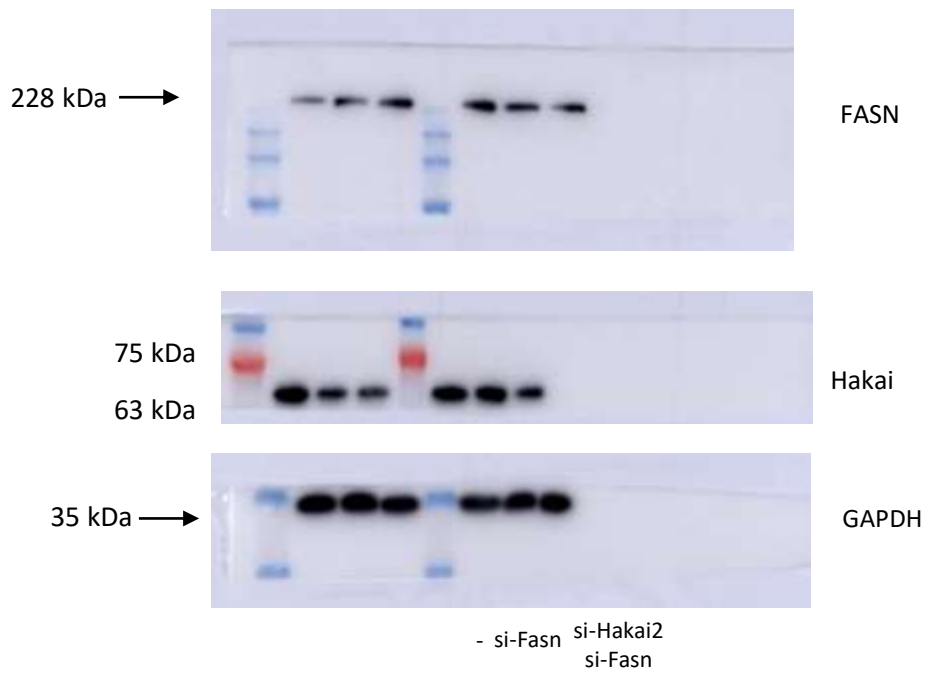

S1

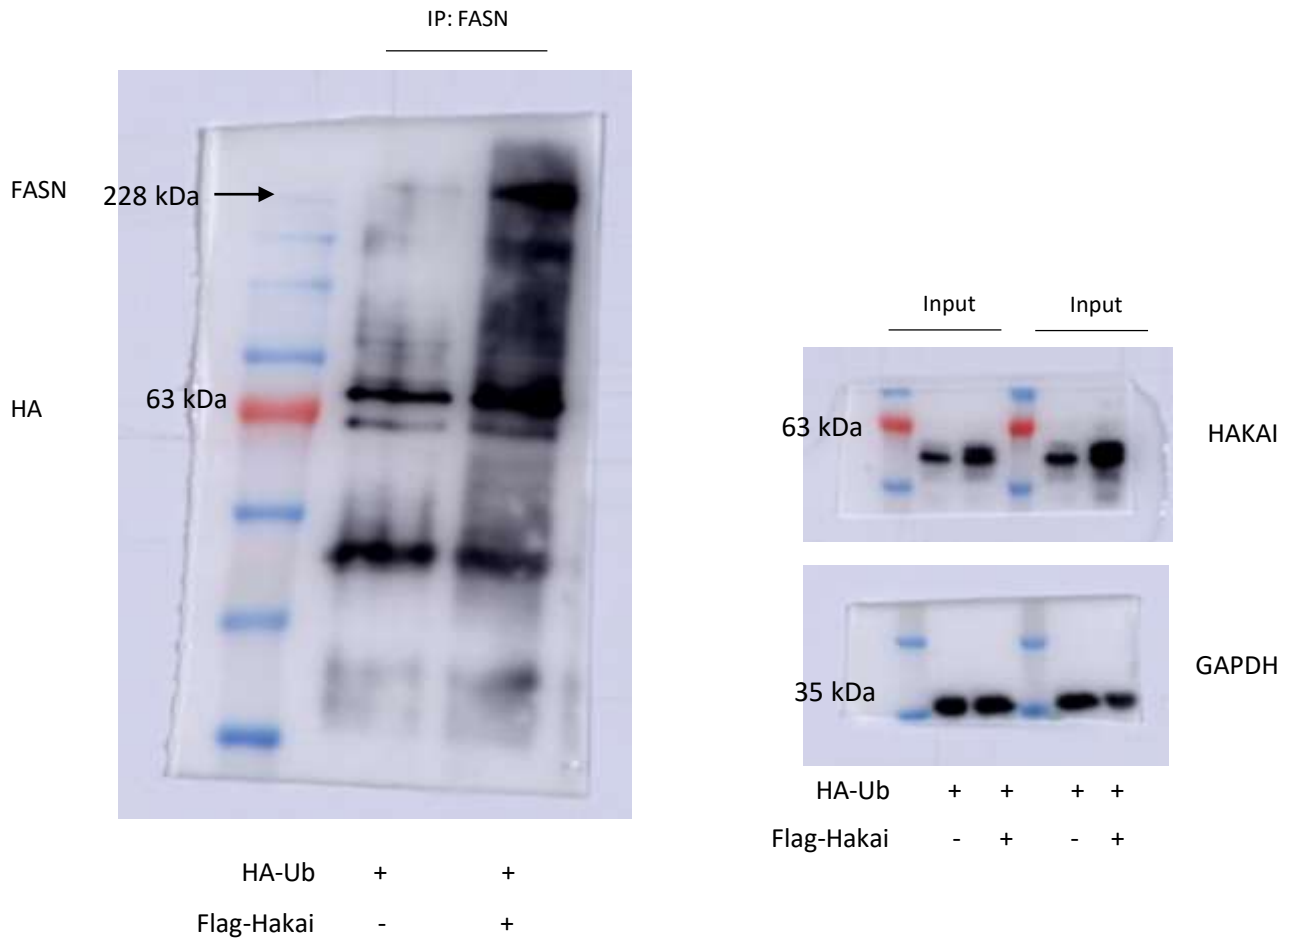

Fig. S14. Full blots corresponding to Figure 5 C and Fig S1
